# Supplementary material for: Amyloid-β sequester proteins as blood-based biomarkers of cognitive decline
Source: PubMed Central journal article supplement — Alzheimers Dement (Amst). 2015 Jun 15;1(2):270–80. doi: 10.1016/j.dadm.2015.04.003 (PMC4876892; doi:10.1016/j.dadm.2015.04.003), 2015-06-15
Supplement: mmc1.pdf [file mmc1.pdf]

**Uchida, K. *et al.***

## **Supplementary Materials**

## **Supplementary Methods**

### **1. Tone cohort**

#### **1.1. Neuropsychological battery in the longitudinal study**

All participants in the Tone cohort underwent group assessment, named the 5-Cog, which used a set of five tests that measured the following cognitive domains: attention, memory, visuospatial function, language, and reasoning. Attention was evaluated by a Japanese version of a set dependency activity [1]. The category-cued recall test [2] was used to assess memory ability. The clock-drawing test, which required participants to draw the hands of a clock to depict the time at “ten after eleven” [3], was used to assess visuospatial function. Language ability was examined using a category fluency test [4]. The similarities subtest of the Wechsler Adult Intelligence Scale-Revised (WAIS-R) [5] was employed to assess abstract reasoning ability.

#### **1.2. Demographics and medical issues**

Information on age, sex, education, occupation, marital status, family members, daily activities, previous medical and psychiatric diseases, medication, alcohol, and smoking as dementia risk factors were included in the questionnaire.

#### **1.3. Assessment of mood status**

To assess depression, a 15-item short version of the Geriatric Depression Scale for

mood evaluation was required [6]. The participants who scored six were considered to have depressive symptoms.

#### **1.4. Complaints of memory loss**

Nineteen items from the Deterioration de Cognitive Observed were conducted to decide whether participants had memory difficulties. If the participants indicated problems on  $\geq 1$  item, memory difficulties were considered to be present.

#### **1.5. Assessment of activities of daily living**

Nishimura's Activities of Daily Living (N-ADL) test [7] was used. This test reviewed five daily activities: walking/transferring, going outside, dressing/ bathing, feeding, and toileting. No difficulties were reported for any of the five items of N-ADL; thus, the participants were considered functionally normal.

#### **1.6. Assessment of cognition function**

All the participants underwent an assessment named the 5-Cog, which used a set of tests to measure five cognitive domains: attention, memory, visuospatial function, language, and reasoning. The 5-Cog cognitive assessment was conducted by an examiner for a group of 50 participants (maximum) and with the use of a projector. All the participants were asked to record their answers on an answer sheet. Mean duration of the 5-Cog examination was 35 min. For participants who had difficulty understanding the tasks or

impaired hearing or vision, the 5-Cog examination was individualized in a face-to-face setting. During the interview, the participants who could not respond to our instructions or to some of the scales because of obvious cognitive impairment were also identified.

## **2. Serum sampling**

Blood was sampled from the cubital veins and was placed into blood collection tubes (Venoject-II® Autostep; Terumo Corporation, Tokyo, Japan). After coagulation of the blood sample for 30 min at room temperature followed by centrifugation at 1,300 g for 15 min at 20°C, serum was transferred to 1.5 ml tubes (TreffLab, Degersheim, Switzerland) and was then stored at –80°C until further use.

## **3. Immunoassay and *APOE* genotyping**

The serum samples were analyzed using multiplex microsphere-based Luminex xMAP (Luminex Corp, Austin, TX) using HNDG1-36K [complement C3 (C3), TTR, apoE, apoA1] and HNDG2-36K kits [complement C4 (C4), macrophage inflammatory protein (MIP)-4] (EMD Millipore, Billerica, MA). This multi-immunoassay allowed the simultaneous quantification of all proteins in each kit described above. In the determination of serum levels of proteins, quality control proteins of each analyte were

included in each assay. We also added control serum samples to monitor reproducibility in each experiment.

For apoA1, C3, and TTR, the analyte proteins bound to immunobeads by immunoprecipitation (IP)-Western blotting were characterized. Based on IP-Western blotting, the molecular weights of apoA1 and TTR were 27 kDa and 15 kDa, respectively, and that of C3 corresponded to the weight of a full-length C3, not the inactivated form. These measurements approximately matched the calculated molecular masses (data not shown). *APOE* genotyping was performed using standard procedures [8].

#### **4. Statistical analysis**

In the statistical analysis, we first analyzed for the normality of distribution by Bartlett test, and non-parametric test was applied for data that were non-normal in distribution. For data consisting of more than three groups, Kruskal-Wallis test was used. Bonferroni correction was applied when two groups were compared. In the longitudinal analysis, Wilcoxon signed-rank test was used to analyze for significant differences between 2005 and 2008 in each individual.

## References

- [1] Sohlberg MM, Mateer CA. Training use of compensatory memory books: a three stage behavioral approach. *J Clin Exp Neuropsychol* 1989;11:871-91.
- [2] Grober E, Buschke H, Crystal H, Bang S, Dresner R. Screening for dementia by memory testing. *Neurology* 1988;38:900-3.
- [3] Freedman M, Leach L, Kaplan E, Winnocur G, Shulman KI, Delis DC. *Clock Drawing : A Neuropsychological Analysis*. New York: Oxford University Press; 1994.
- [4] Solomon PR, Pendlebury WW. Recognition of Alzheimer's disease: the 7 Minute Screen. *Fam Med* 1998;30:265-71.
- [5] Wechsler D. *WAIS-R: Manual : Wechsler adult intelligence scale--revised*. New York: Psychological Corporation; 1981.
- [6] Yesavage JA, Brink TL, Rose TL, Lum O, Huang V, Adey M, et al. Development and validation of a geriatric depression screening scale: a preliminary report. *J Psychiatr Res* 1982;17:37-49.
- [7] Nishimura T, Kobayashi T, Hariguchi S, Takeda M, Fukunaga T, Inoue O, et al. Scales for mental state and daily living activities for the elderly: clinical behavioral scales for assessing demented patients. *Int Psychogeriatr* 1993;5:117-34.
- [8] Wenham PR, Price WH, Blandell G. Apolipoprotein E genotyping by one-stage PCR. *Lancet*

1991;337:1158-9.

Supplementary Table 1. Demographic characteristics of participants in the longitudinal study of the Tone cohort

| Characteristics        | NDC during follow up<br>(n = 20) | NDC-MCI<br>(n = 9) | MCI-sMCI/AD<br>(n = 6) | <i>P</i> value <sup>*</sup> |
|------------------------|----------------------------------|--------------------|------------------------|-----------------------------|
| Age in 2005            | 76.4 ± 5.8 <sup>†</sup>          | 73.7 ± 6.4         | 74.7 ± 5.7             | 0.5231                      |
| Age in 2008            | 80.3 ± 5.8                       | 77.6 ± 6.4         | 78.3 ± 5.7             | 0.43784                     |
| Male / Female          | 7/13                             | 2/7                | 2/4                    |                             |
| Years of education     | 10.3 ± 2.4                       | 9.8 ± 1.9          | 11.5 ± 2.9             | 0.4752                      |
| BMI <sup>‡</sup>       | 22.6 ± 2.4                       | 23.8 ± 5.0         | 24.3 ± 5.0             | 0.35639                     |
| GDS Score <sup>‡</sup> | 2.1 ± 1.7                        | 3.6 ± 3.5          | 3.6 ± 2.6              | 0.31795                     |
| Cigarette smoking      | 4                                | 1                  | 2                      |                             |
| Alcohol drinking       | 7                                | 1                  | 2                      |                             |
| APOE ε4 carrier        | 3                                | 0                  | 2                      |                             |
| History of disease     |                                  |                    |                        |                             |
| Cardiovascular disease | 1                                | 0                  | 0                      |                             |
| Diabetes mellitus      | 1                                | 0                  | 1                      |                             |
| Hyperlipidemia         | 0                                | 0                  | 0                      |                             |
| Hypertension           | 2                                | 2                  | 1                      |                             |

<sup>\*</sup>Kruskal-Wallis test. Significant differences among the groups are indicated.

<sup>†</sup>mean ± SD

<sup>‡</sup>Values in 2008



Supplementary Table 2. Serum levels of ApoE, ApoA1, C3, C4, TTR, MIP4 in the longitudinal analysis of the Tone cohort

| Analyte | 2001 | 2005 | 2008      | 2005                      | 2008           | <i>P</i> value* |
|---------|------|------|-----------|---------------------------|----------------|-----------------|
| ApoE    | NDC  | NDC  | NDC       | 108.5 ± 35.6 <sup>†</sup> | 83.3 ± 19.1    | 4.19E-04        |
|         | NDC  | NDC  | MCI       | 111.2 ± 30.1              | 80.0 ± 33.9    | 0.01285         |
|         | NDC  | MCI  | sMCI / AD | 124.0 ± 25.5              | 68.1 ± 15.9    | 0.03603         |
| ApoA1   | NDC  | NDC  | NDC       | 1687.4 ± 593.0            | 1315.3 ± 444.6 | 0.00109         |
|         | NDC  | NDC  | MCI       | 2025.6 ± 222.3            | 1199.4 ± 401.5 | 0.00915         |
|         | NDC  | MCI  | sMCI / AD | 1958.2 ± 288.0            | 1236.4 ± 160.2 | 0.03603         |
| C3      | NDC  | NDC  | NDC       | 100.4 ± 52.2              | 71.6 ± 32.6    | 0.04579         |
|         | NDC  | NDC  | MCI       | 100.3 ± 42.4              | 78.7 ± 46.7    | 0.40694         |
|         | NDC  | MCI  | sMCI / AD | 71.8 ± 76.4               | 59.1 ± 27.7    | 1.00            |
| C4      | NDC  | NDC  | NDC       | 30.3 ± 63.7               | 63.7 ± 26.8    | 3.15E-04        |
|         | NDC  | NDC  | MCI       | 37.9 ± 30.0               | 71.6 ± 24.0    | 0.03297         |
|         | NDC  | MCI  | sMCI / AD | 22.4 ± 22.8               | 62.6 ± 33.0    | 0.05906         |
| TTR     | NDC  | NDC  | NDC       | 299.3 ± 58.7              | 288.7 ± 69.2   | 0.66769         |
|         | NDC  | NDC  | MCI       | 352.9 ± 61.0              | 312.6 ± 73.7   | 0.15513         |
|         | NDC  | MCI  | sMCI / AD | 280.0 ± 60.6              | 218.6 ± 32.4   | 0.09349         |
| MIP-4   | NDC  | NDC  | NDC       | 0.12 ± 0.07               | 0.11 ± 0.07    | 0.40092         |
|         | NDC  | NDC  | MCI       | 0.11 ± 0.07               | 0.12 ± 0.07    | 0.72228         |
|         | NDC  | MCI  | sMCI / AD | 0.12 ± 0.06               | 0.11 ± 0.05    | 0.40168         |

\*Wilcoxon test

<sup>†</sup>mean ± SD

Supplementary Table 3. Characteristics of participants and serum levels of apoE, apoA1, C3, C4, TTR and MIP-4 in the cross-sectional analysis of Tone cohort

| Analyte            | NDC<br>(n = 49)         | MCI<br>(n = 15) | sMCI / AD<br>(n = 6)      | P value* |
|--------------------|-------------------------|-----------------|---------------------------|----------|
| Age                | 77.5 ± 6.3 <sup>†</sup> | 76.4 ± 6.1      | 78.3 ± 5.7                | 0.73634  |
| Male/Female        | 16/33                   | 4/11            | 2/4                       |          |
| ApoE <sup>§</sup>  | 98.7 ± 31.1             | 97.6 ± 37.2     | 68.1 ± 15.9               | 0.0278   |
| ApoA1 <sup>§</sup> | 1597.7 ± 544.6          | 1502.9 ± 519.4  | 1236.4 ± 160.2            | 0.23319  |
| C3 <sup>§</sup>    | 88.6 ± 44.8             | 75.9 ± 57.8     | 59.1 ± 27.7               | 0.13999  |
| C4 <sup>§</sup>    | 45.4 ± 30.4             | 53.5 ± 32.0     | 66.8 ± 35.0               | 0.33774  |
| TTR <sup>§</sup>   | 304.8 ± 66.6            | 299.5 ± 68.5    | 218.6 ± 32.4 <sup>¶</sup> | 0.01264  |
| MIP-4 <sup>§</sup> | 0.11 ± 0.07             | 0.12 ± 0.07     | 0.10 ± 0.05               | 0.85988  |

\*Kruskal-Wallis test. Significant differences among the three groups are indicated.

<sup>†</sup>mean ± SD

<sup>§</sup>µg/ml

<sup>¶</sup>Bonferroni test. A significant difference between NDC and sMCI/AD was observed in TTR ( $P = 0.02025$ ).

Supplementary Table 4. Characteristics of participants from the Tone and Tsukuba cohorts with MMSE score and serum levels of apoA1, C3, TTR, apoE, C4, and MIP-4

| Characteristics    | MMSE score               |                |                |                             | P value* |
|--------------------|--------------------------|----------------|----------------|-----------------------------|----------|
|                    | 27-30 (n=71)             | 24-26 (n=34)   | 20-23 (n=17)   | <20 (n=20)                  |          |
| Age                | 69.7 ± 11.0 <sup>†</sup> | 72.8 ± 8.2     | 76.0 ± 6.7     | 72.1 ± 7.8                  | 0.14277  |
| Male/Female        | 39 / 32                  | 17 / 17        | 13 / 4         | 16 / 4                      |          |
| ApoA1 <sup>‡</sup> | 2148.5 ± 857.1           | 1940.4 ± 645.0 | 1710.5 ± 528.8 | 1645.1 ± 328.5 <sup>§</sup> | 0.00359  |
| C3 <sup>‡</sup>    | 23.8 ± 21.6              | 15.2 ± 10.1    | 20.4 ± 16.9    | 22.3 ± 15.4                 | 0.32561  |
| TTR <sup>‡</sup>   | 478.6 ± 182.4            | 455.6 ± 178.9  | 380.5 ± 108.5  | 364.3 ± 138.0 <sup>§</sup>  | 0.01894  |
| ApoE <sup>‡</sup>  | 102.4 ± 31.2             | 114.5 ± 47.4   | 120.1 ± 38.0   | 114.8 ± 35.7                | 0.46029  |
| C4 <sup>‡</sup>    | 67.2 ± 34.3              | 80.6 ± 29.5    | 85.3 ± 40.5    | 69.8 ± 27.3                 | 0.35412  |
| MIP-4 <sup>‡</sup> | 0.41 ± 0.19              | 0.53 ± 0.14    | 0.41 ± 0.14    | 0.39 ± 0.18                 | 0.04523  |

\*Kruskal-Wallis test. Significant differences among the three groups are indicated.

<sup>†</sup>mean ± SD

<sup>‡</sup>μg/ml

<sup>§</sup>Bonferroni test. Significant differences in MMSE score 27-30 vs. <20 were observed in ApoA1 ( $P = 0.0396$ ) and TTR ( $P = 0.05074$ ).

Supplementary Table 5. Characteristics of participants and serum apoA1, C3, and TTR levels in the prospective study for MCI and AD risk analysis in the Uji cohort

|                              |                |
|------------------------------|----------------|
| Total number of participants | 258            |
| Age                          | 68.9 ± 10.9*   |
| Male / Female                | 98 / 160       |
| APOE e4 carrier, %           | 23.6           |
| MMSE score                   | 27.3 ± 4.0     |
| ApoA1 <sup>†</sup>           | 1588.5 ± 412.2 |
| C3 <sup>†</sup>              | 6.4 ± 2.7      |
| TTR <sup>†</sup>             | 388.4 ± 149.1  |

\*mean ± SD

<sup>†</sup>μg/ml

Supplementary Table 6. Summary of peripheral sequester protein levels in MCI and AD in the longitudinal, cross-sectional, and prospective studies

| Group              | Tone cohort: longitudinal study* |                     |                    | Tone cohort:<br>cross-sectional study | Tsukuba cohort:<br>cross-sectional study |                     | Uji cohort:<br>prospective study | Function                                                                                                                                                                                        |
|--------------------|----------------------------------|---------------------|--------------------|---------------------------------------|------------------------------------------|---------------------|----------------------------------|-------------------------------------------------------------------------------------------------------------------------------------------------------------------------------------------------|
|                    | NDC-NDC                          | NDC-MCI             | MCI-sMCI / AD      | NDC vs. MCI vs. sMCI/AD               | NDC vs. aMCI                             | NDC vs. AD          | NDC vs. MCI                      |                                                                                                                                                                                                 |
| Apolipoprotein     | ApoA1 ↓<br>0.00109               | ApoA1 ↓<br>8.41E-04 | ApoA1 ↓<br>0.00179 | ApoA1 ↓<br>0.23319                    | ApoA1 ↓<br>0.00265                       | ApoA1 ↓<br>1.98E-05 | ApoA1 ↓<br>0.03907               | ApoA1 is involved in Aβ clearance via cholesterol/lipoprotein transporter ATP-binding cassette transporter A1 (ABCA1).                                                                          |
|                    | ApoE ↓<br>0.00126                | ApoE →<br>0.00162   | ApoE ↓<br>0.00161  | ApoE ↓<br>0.0278                      | ApoE →<br>0.19892                        | ApoE →<br>0.72119   | —                                | At the blood–brain barrier, soluble Aβ is predominantly transported from the interstitial fluid into the blood stream via LRP1 and p-glycoprotein.                                              |
| Complement         | C3 ↓<br>0.04671                  | C3 ↓<br>0.38647     | C3 →<br>0.75317    | C3 ↓<br>0.13999                       | C3 ↓<br>3.74E-04                         | C3 ↓<br>0.23189     | C3 ↓<br>0.03305                  | Complement activation clears immune complexes including Aβ. The complement system may also lead to host cell damage and to neurons being particularly susceptible to complement–mediated damage |
|                    | C4 ↑<br>1.98E-05                 | C4 ↑<br>0.03374     | C4 ↑<br>5.02E-04   | C4 ↑<br>0.33774                       | C4 →<br>1.00                             | C4 →<br>1.00        | —                                |                                                                                                                                                                                                 |
| Aβ-binding protein | TTR →<br>0.53406                 | TTR →<br>0.18291    | TTR ↓<br>0.06541   | TTR ↓<br>0.01264                      | TTR ↓<br>0.0634                          | TTR ↓<br>1.08E-05   | TTR ↓<br>0.25651                 | TTR binds to all forms of soluble Aβ, monomer, oligomer, and fibrils. TTR inhibits Aβ deposition and reduces its toxicity.                                                                      |

\*MIP-4 levels did not significantly change with cognitive decline.

**A**

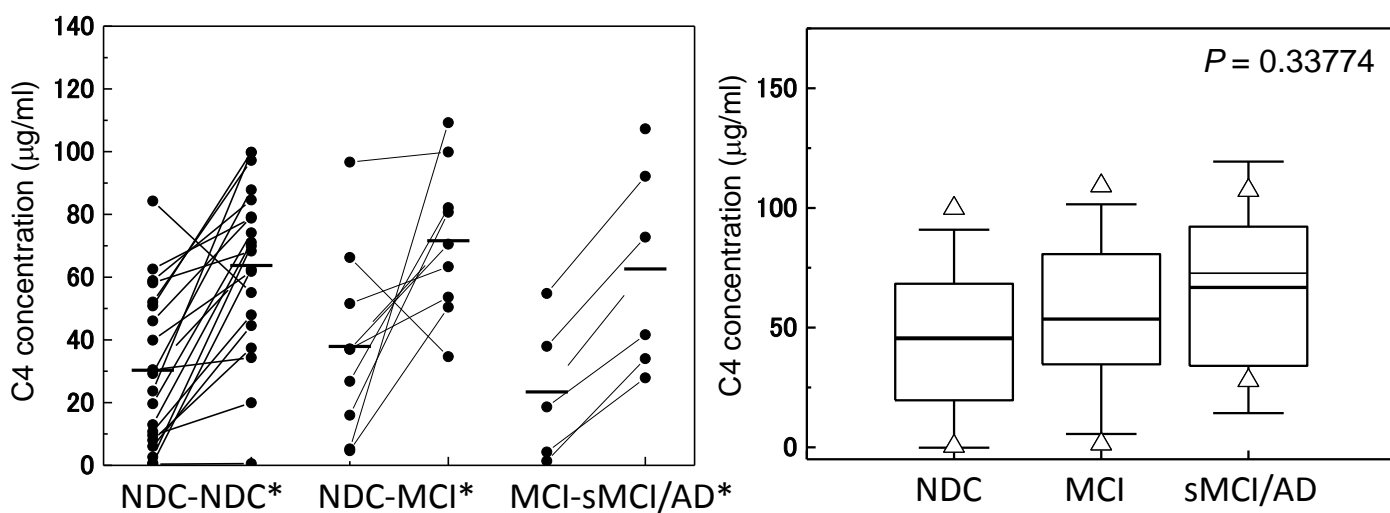

**B**

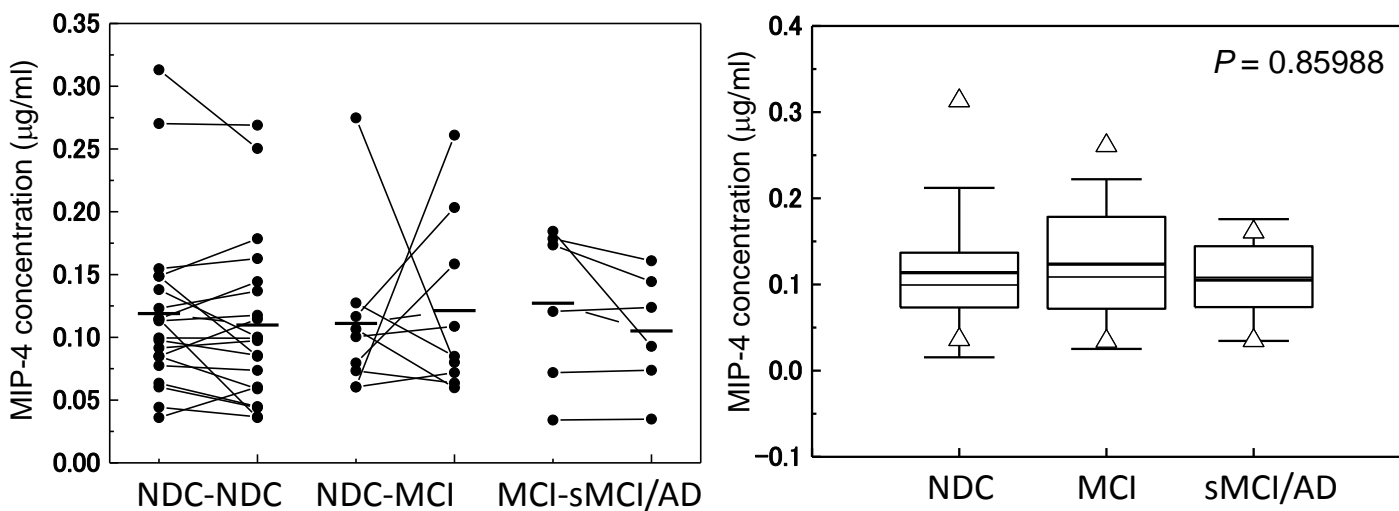

**Supplementary Fig. 1.** Serum levels of C4 (**A**) and MIP-4 (**B**) in NDC, MCI, sMCI/AD in the longitudinal (left panel) and cross-sectional (right panel) analyses of Tone cohort participants. Significant differences were observed in C4: NDC-NDC ( $P = 1.98E-05$ ), NDC-MCI ( $P = 0.03374$ ), and MCI-sMCI/AD ( $P = 5.02E-04$ ).

**A**

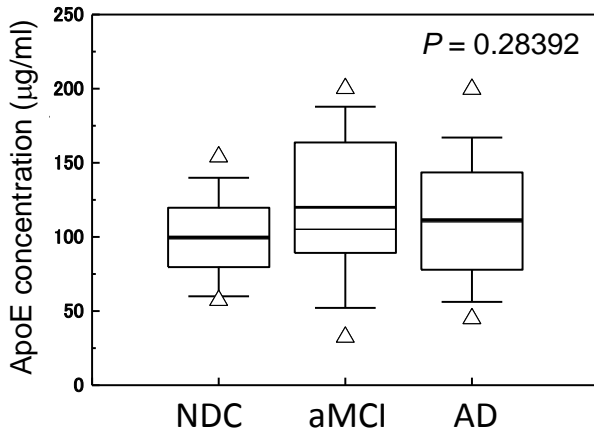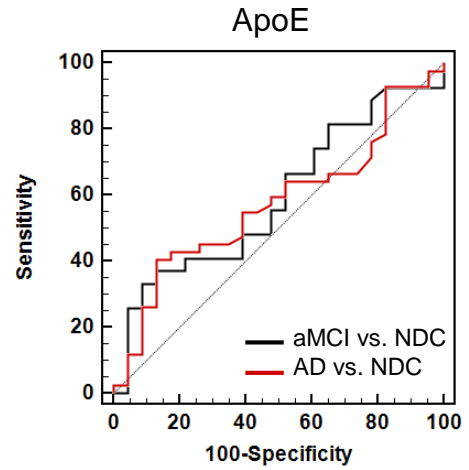

**B**

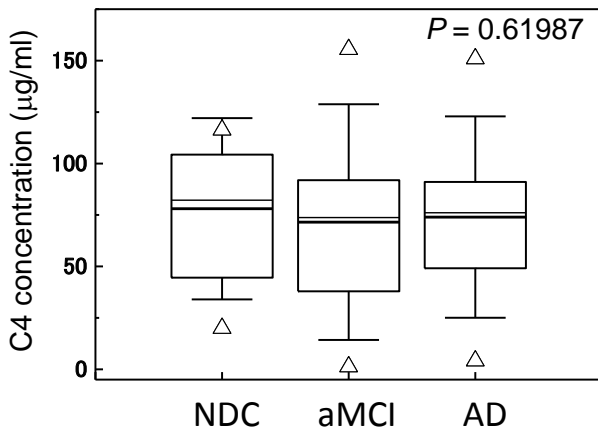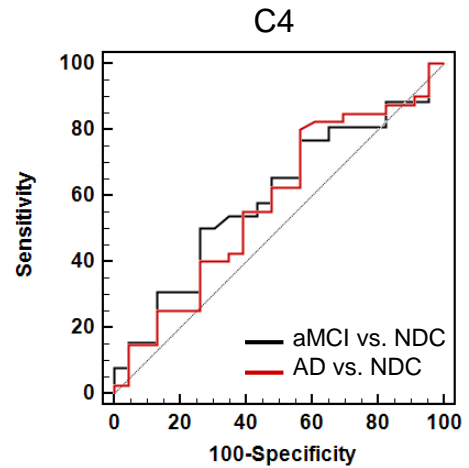

**C**

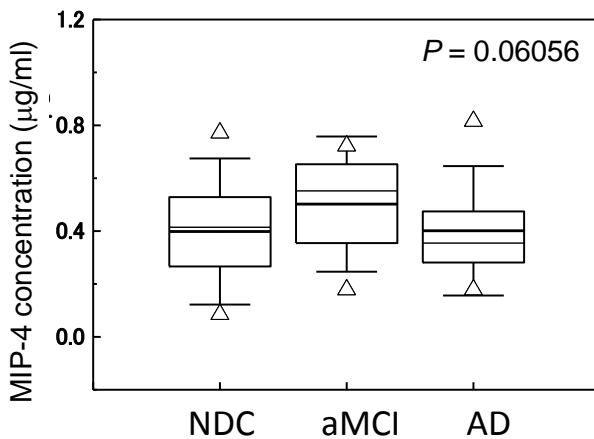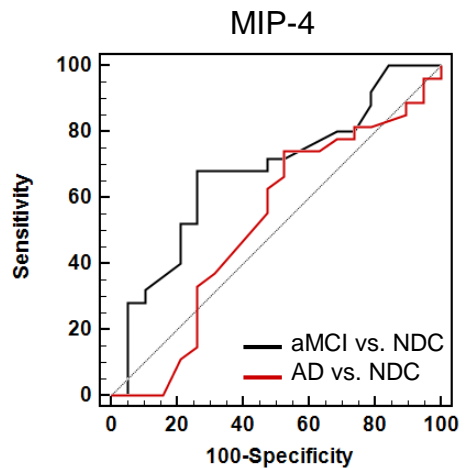

**Supplementary Fig. 2.** Serum levels of apoE (**A**), C4 (**B**), and MIP-4 (**C**) in NDC ( $n = 49$ ), aMCI ( $n = 51$ ), and AD ( $n = 42$ ) groups in a cross-sectional study (left panel) of the Tsukuba cohort and their corresponding  $C$ -statistics (right panel).

**A**

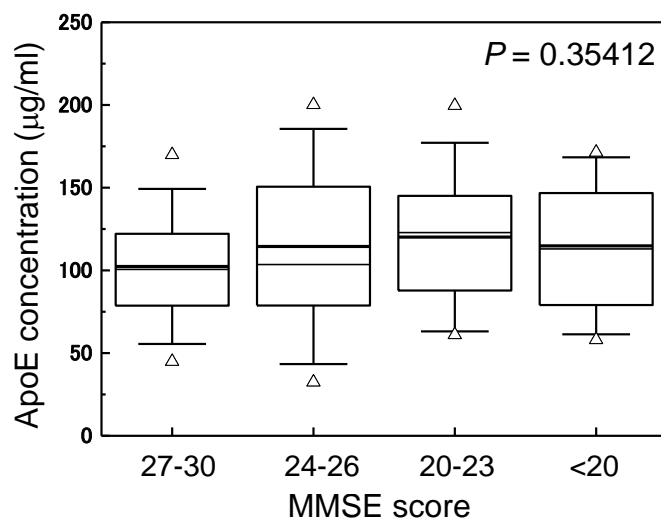

**B**

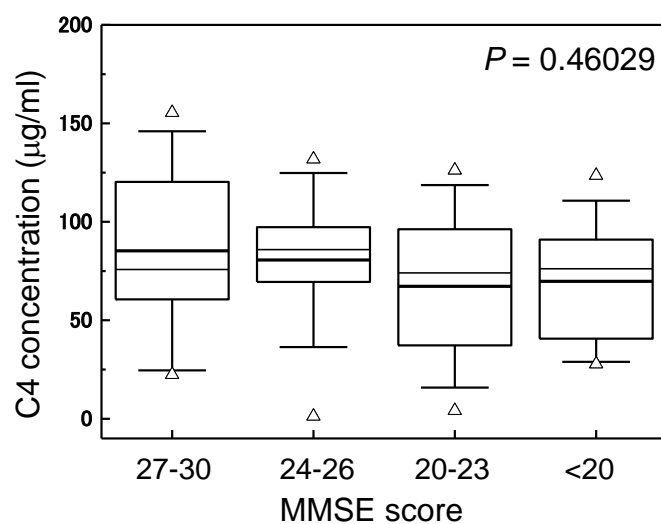

**C**

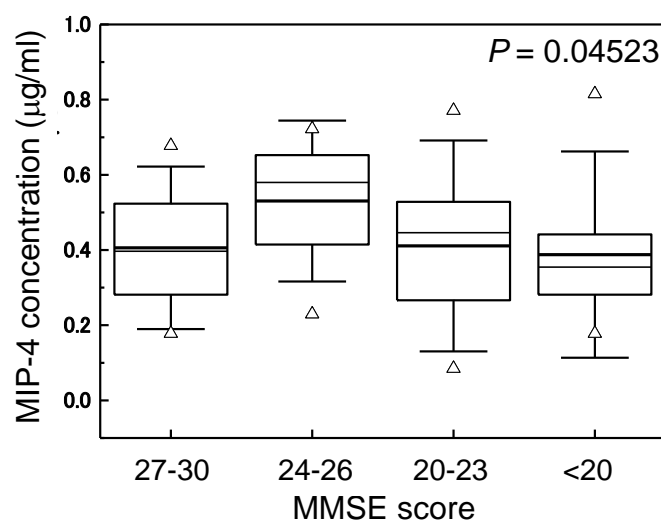

**Supplementary Fig. 3.** Relationship among apoE (A), C4 (B), and MIP-4 (C) levels and the MMSE scores in a cross-sectional study of the Tsukuba cohort.
